# Supplementary material for: Low thermal quenching of metal halide-based metal–organic framework phosphor for light-emitting diodes
Source: Royal Society of Chemistry journal article supplement (doi:10.1039/d4sc04228j), 2024-01-01
Supplement: d4sc04228j1.pdf [file d4sc04228j1.pdf]

Electronic Supplementary Information

**Low thermal quenching of metal halide based metal–organic  
framework phosphor for light-emitting diodes**

**Xiao-Gang Yang,\* Ying-Jun Chen, Pei-Pei Yin, Yan Li, Shu-Yao Yang, Yi-Man  
Li, and Lu-Fang Ma\***

*College of Chemistry and Chemical Engineering, Luoyang Normal University, Henan Key  
Laboratory of Function-Oriented Porous Materials, Luoyang 471934, P. R. China.*

**Corresponding Author**

\*E-mail: yxg2233@126.com; mazhuxp@126.com

## 1. Experimental Section

### 1.1. Materials and methods

All the starting reagents and solvents were commercially available and used as received without further purification. Powder X-ray diffraction (PXRD) patterns were measured at room temperature using a Bruker D8-ADVANCE X-ray diffractometer with Cu  $K\alpha$  radiation ( $\lambda = 1.5418 \text{ \AA}$ ). Intensity data were collected in a  $2\theta$  range of 5–50° with a step of 0.02° ( $2\theta$ ) and a counting time of 0.2 s/step. Elemental analyses for C, H, and N were carried out on a Flash 2000 organic elemental analyzer. The IR spectrum was recorded in the range of 4000–400  $\text{cm}^{-1}$  on a Nicolet 6700 (Thermo) FT-IR spectrometer with KBr pellets. Thermalgravimetric analyses (TGA) was carried out on a SDT Q600 thermogravimetric analyzer with a heating rate of 10 °C/min under a  $\text{N}_2$  atmosphere. Photoluminescence (PL) spectra and decay curve were tested on Edinburgh FLS1000 fluorescence spectrometer equipped with a xenon arc lamp (Xe900) for fluorescence spectra, nanosecond flash-lamp (nF900) for PL decay curve. The temperature dependence PL spectra were measured using a temperature controller attached to a cryostat (Oxford Ltd. Optistat DN2) using an FLS1000 fluorescence spectrometer.

### 1.2. Synthesis of $[\text{CdCl}_2(\text{AD})]$

A mixture of acridine (0.2 mmol, 35.844 mg),  $\text{CdCl}_2$  (0.2 mmol, 45.672 mg), and EtOH (8 mL) was sealed in a 25 mL Teflon-lined stainless steel vessel reactor. The mixture was heated at 120 °C for 3 hours, and then cooled to room temperature about 8 hours. Light-yellow crystals of  $[\text{CdCl}_2(\text{AD})]$  were obtained. Then, washed with

ethanol several times and filtered, dried in natural environment. Elemental analysis calcd. (%) for  $C_{13}H_9CdCl_2N$ : C 43.06, H 2.50, N 3.86; found (%): C 43.26, H 2.11, N 3.34. FT-IR ( $cm^{-1}$ ): 3052 w, 1620 s, 1563 s, 1518 s, 1465 s, 1390 m, 1293 m, 966 s, 930 s, 784 s, 731 s, 664 s, 479 m.

### 1.3. X-ray crystal structure

Single-crystal X-ray diffraction data for  $[CdCl_2(AD)]$  was obtained at room temperature (293K) on an Oxford Diffraction SuperNova area-detector diffractometer using mirror optics monochromated Mo  $K\alpha$  radiation ( $\lambda = 0.71073 \text{ \AA}$ ). The Data collection, data reduction and empirical absorption correction were performed by CrysAlisPro.<sup>1</sup> The crystal structure were solved by direct methods, using SHELXS-2014<sup>2</sup> and least-squares refined with SHELXL-2014<sup>3</sup> using anisotropic thermal displacement parameters for all non-hydrogen atoms. The crystallographic data and selected bond lengths and angles for  $[CdCl_2(AD)]$  were listed in Tables S1 and S2. The CIF file of  $[CdCl_2(AD)]$  (CCDC No. 2364270) can be acquired free of charge from the Cambridge Crystallographic Data Centre via <http://www.ccdc.cam.ac.uk/conts/retrieving.html>.

### 1.4. Electronic structure calculations

The density functional theory (DFT) and charge density distribution were carried out using Dmol3<sup>4</sup> and CASTEP<sup>5</sup> module in Material Studio software package,<sup>6</sup> respectively. All calculations were performed based on the crystallographic information file (cif) from the single-crystal structure of  $[CdCl_2(AD)]$ . The initial geometrical optimizations of the ground state was carried out by Perdew-Wang

(PW91) generalized gradient approximation (GGA) method with the double numerical basis sets plus polarization function (DNP). The self-consistent field (SCF) converged criterion was within  $1.0 \times 10^{-5}$  hartree atom<sup>-1</sup> and the converging criterion of the structure optimization was  $1.0 \times 10^{-3}$  hartree bohr<sup>-1</sup>. The Brillouin zone is sampled by  $1 \times 1 \times 1$  k-points, and test calculations reveal that the increase of k-points does not affect the results.

### **1.5. Photocatalytic degradation of dye**

The photocatalytic activities of the **1** were evaluated by the degradation of methyl orange (MO) under 300 W xenon lamp illumination. A certain amount of photocatalyst **1** (10 mg) was immersed in 30 mL MO (20 mg/L) aqueous solution for reserve. Before irradiation, the suspension was magnetically stirred in the dark for 30 min to achieve the adsorption-desorption equilibrium. Then the mixture solution was exposed to light source, the suspension was centrifuged and then detected by ultraviolet-visible spectrophotometer analysis with a interval of 20 min. Changes in the maximum absorbance of 464 nm was measured spectrophotometrically to determine the decrease in the concentration of the MO.

### **1.6. Optoelectronic measurements.**

Photoelectronic behaviors of **1** were tested by Chenhua CHI 660E electrochemical workstation in a standard three-electrode system with 0.5 M sodium sulfate aqueous solution as electrolyte, platinum wire as counter electrode, Ag/AgCl as the reference electrode, and powder of **1** coated on indium tin oxide (ITO) as working electrode (1.0 cm<sup>2</sup>). It was conducted in a quartz glass reactor of ca. 50 cm<sup>3</sup> and irradiated by a

300 W xenon lamp. The electrochemical impedance spectroscopy Nyquist plots were recorded at 0 V potential in the frequency range of 100 kHz to 100 MHz, and transient photocurrent responses with the on-off cycle's illumination were tested in the three-electrode system at ambient pressure and room temperature.

## **1.7. Fabrication of LED devices**

### 1.7.1. Fabrication of green LED device

40 mg [CdCl<sub>2</sub>(AD)] phosphor was thoroughly mixed with about 20 mL epoxy resin. The mixture was coated on a 365 nm diode chip, and then and then heated at 100 °C for 1 hour.

### 1.7.2. Fabrication of white LED device

30 mg [CdCl<sub>2</sub>(AD)] phosphor and 10 mg commercial N630 red phosphor was thoroughly mixed with about 20 mL epoxy resin. The mixture was coated on a 460 nm diode chip, and then and then heated at 100 °C for 1 hour.

## 2. Supporting Figures

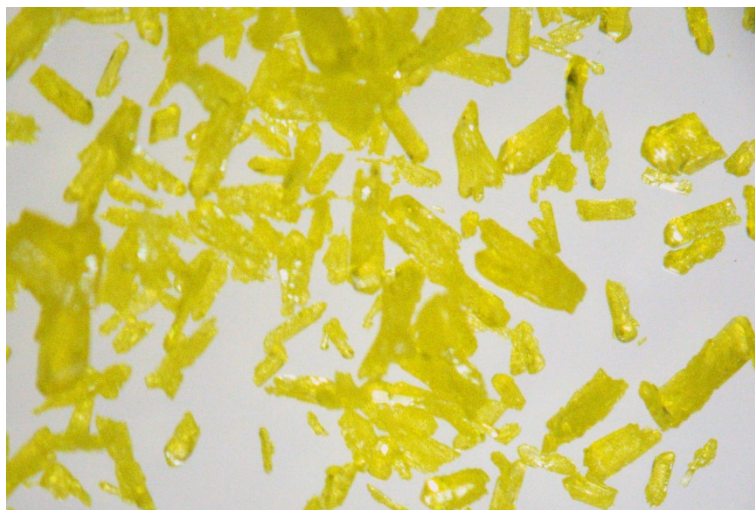

**Figure S1.** Digital photograph of the crystals of title complex **1** synthesized under solvothermal condition.

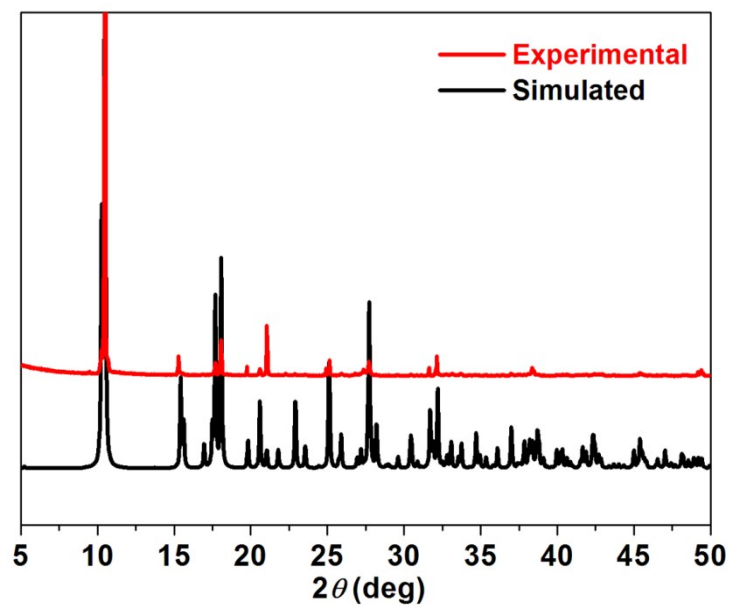

**Figure S2.** Powder X-ray diffraction (PXRD) patterns of simulated (black) and as-prepared (red)  $[\text{CdCl}_2(\text{AD})]$  (**1**) obtained under solvothermal condition.

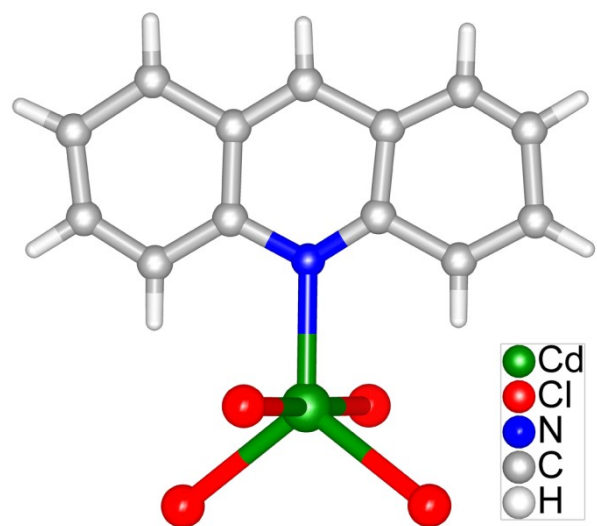

**Figure S3.** View of local coordination environment of Cd(II) atom in **1**.



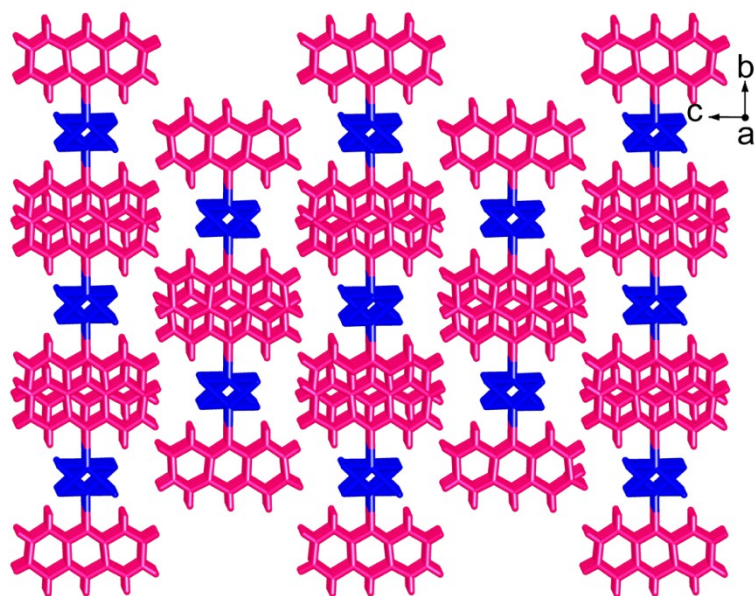

**Figure S4.** View of the 3D structure of **1** showing an alternating arrangement of CdCl<sub>2</sub> inorganic chains electronic acceptor (blue) and AD  $\pi$ -conjugated system electronic donor (rose red).

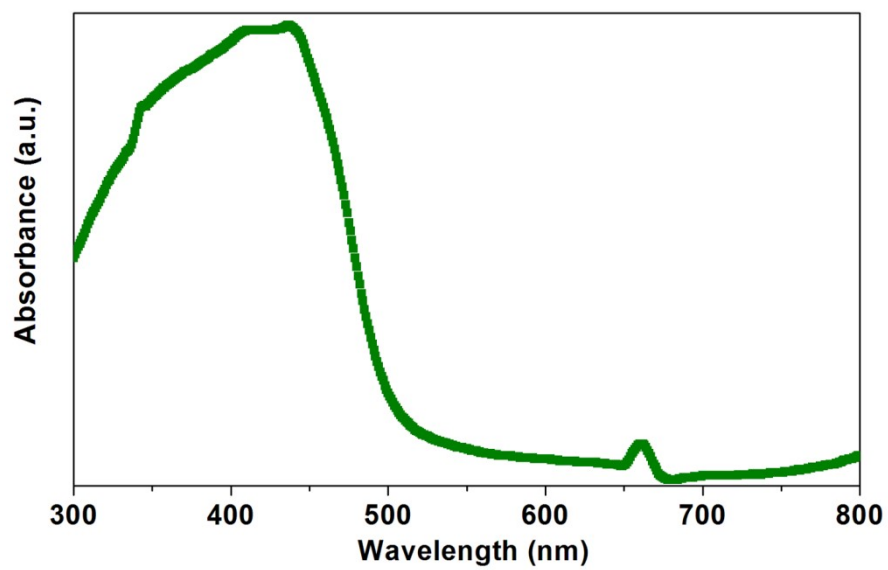

**Figure S5.** UV-vis absorption spectrum of **1** in solid state measured at room temperature.

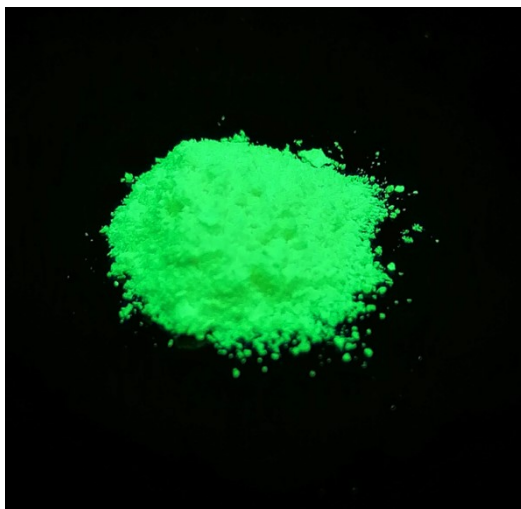

**Figure S6.** Digital photograph of the as-prepared powder sample of **1** under UV (365 nm) light.

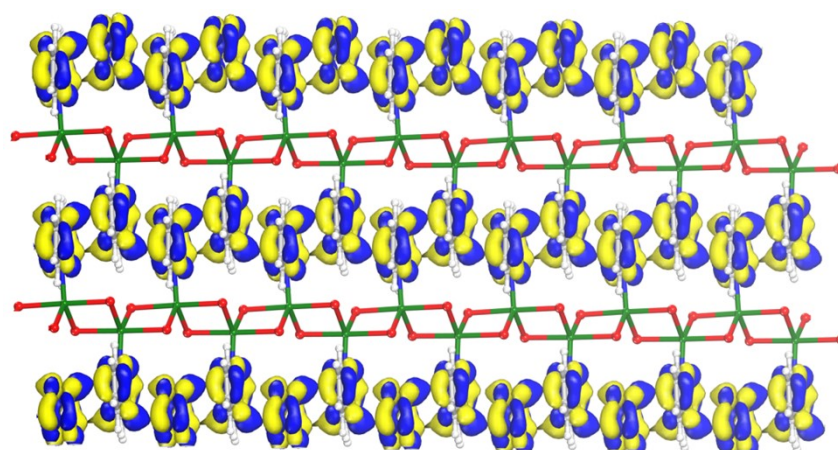

(a)

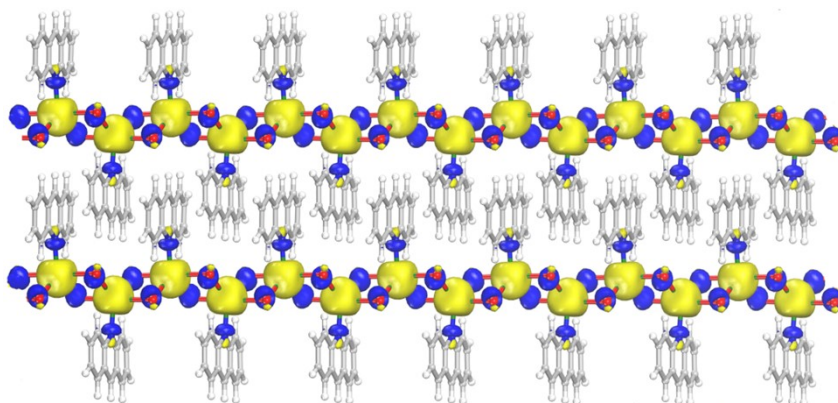

(b)

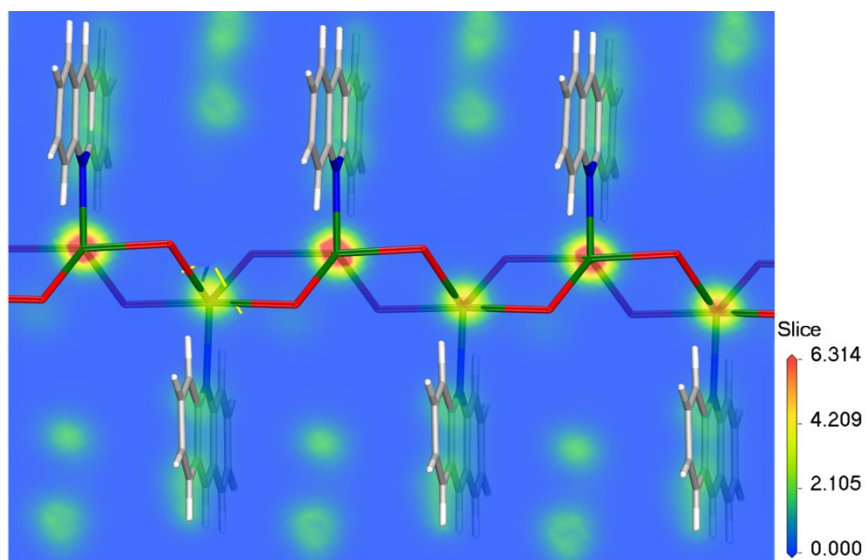

(c)

**Figure S7.** View of the HOMO (a) and LUMO (b) for the DFT optimized structure of **1**. (c) Calculated charge density distribution of **1**.

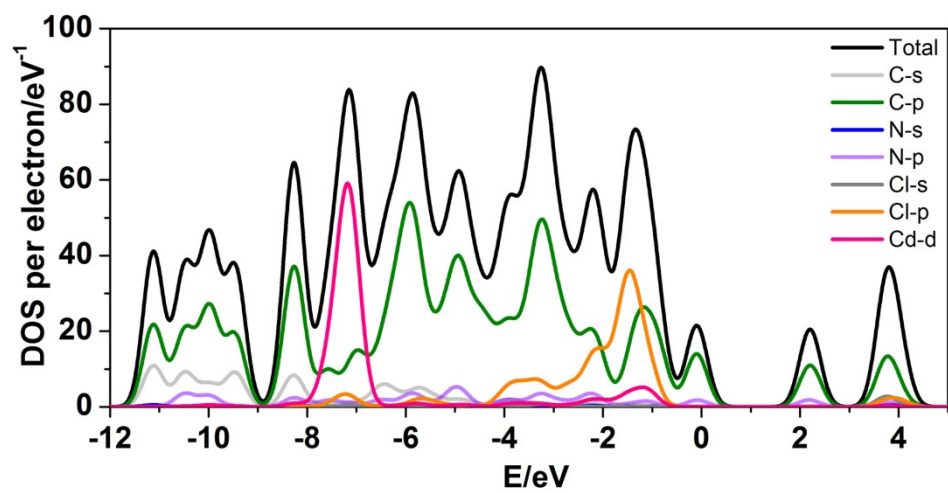

**Figure S8.** Partial electronic density of states (PDOS) of **1**.

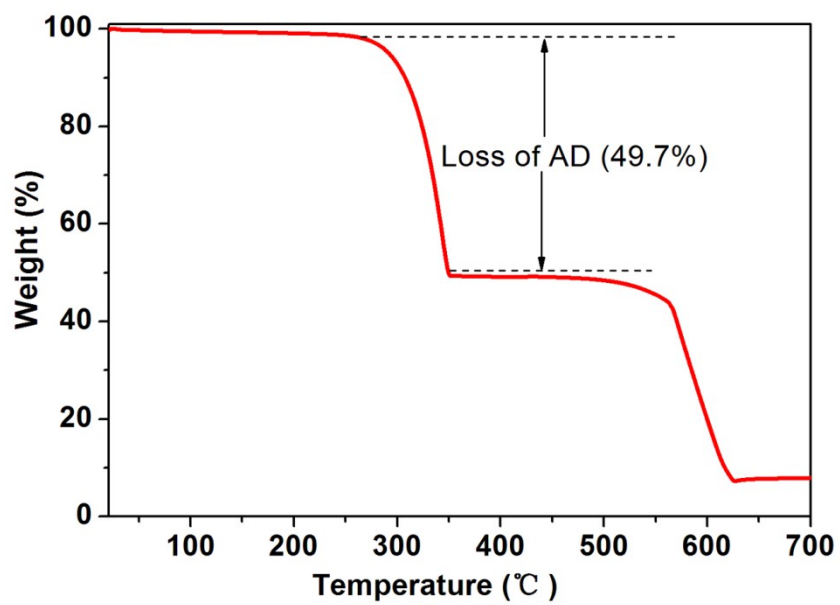

**Figure S9.** Thermogravimetric analysis curve of 1.

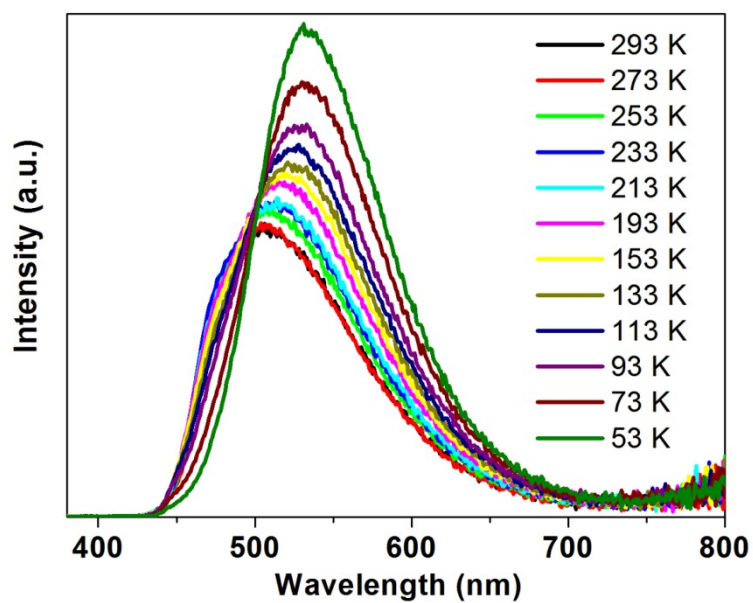

(a)

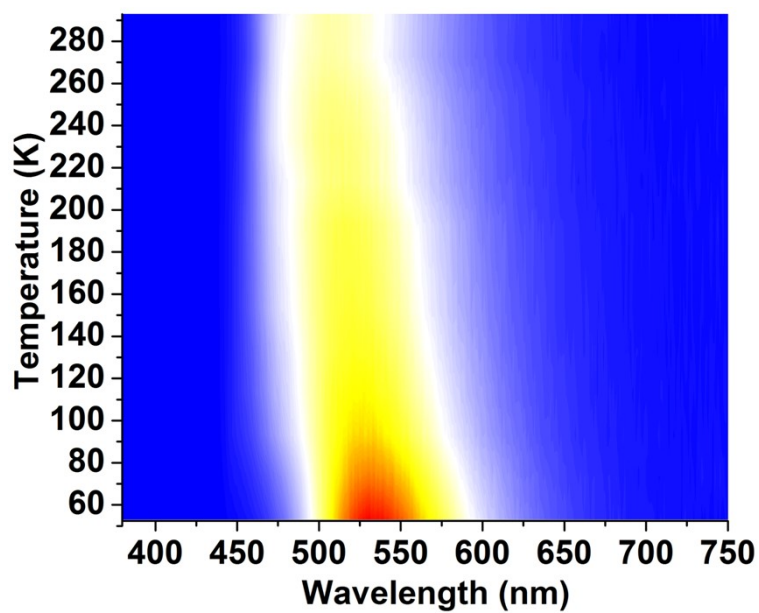

(b)

**Figure S10.** (a) Temperature-dependent PL spectra of **1** in the temperature range of 293–53 K excited at 360 nm. (b) Two-dimensional plot showing the PL spectra of **1** recorded in the temperature range of 293–53 K excited at 360 nm.

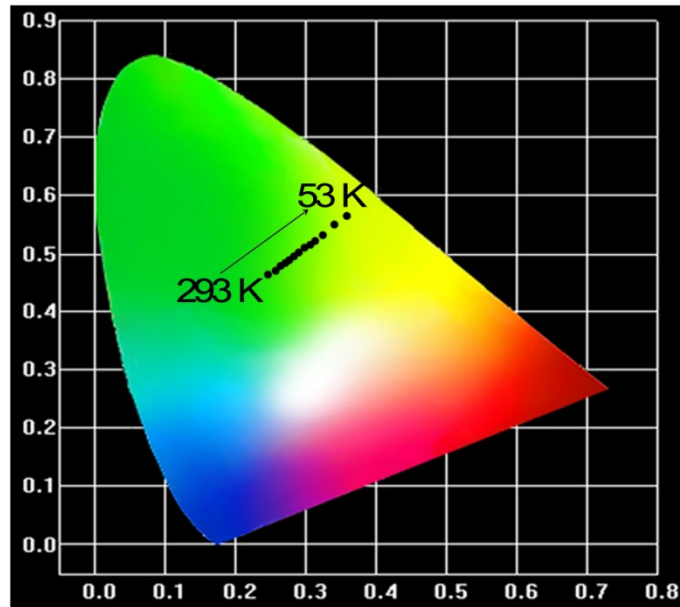

**Figure S11.** CIE-1931 chromaticity diagram showing emission of **1** from 293 to 53 K.



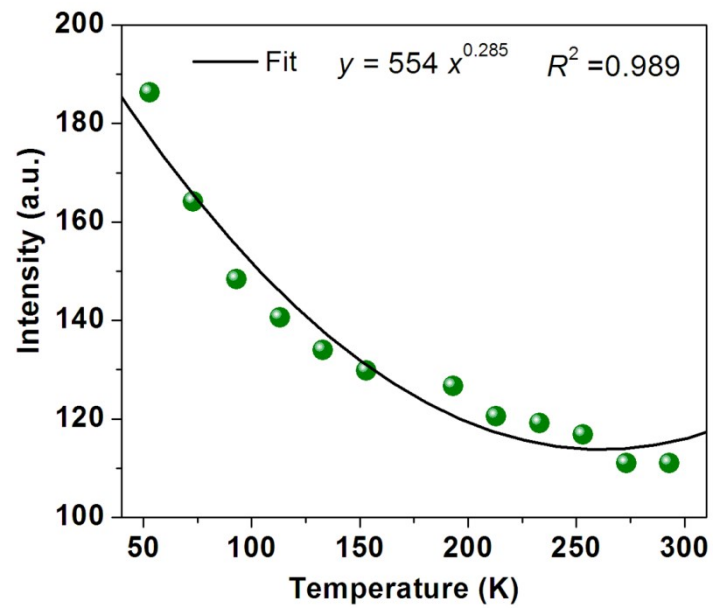

**Figure S12.** Temperature-dependent maximum PL intensity and the fitted curve in the temperature range of 53–293 K.

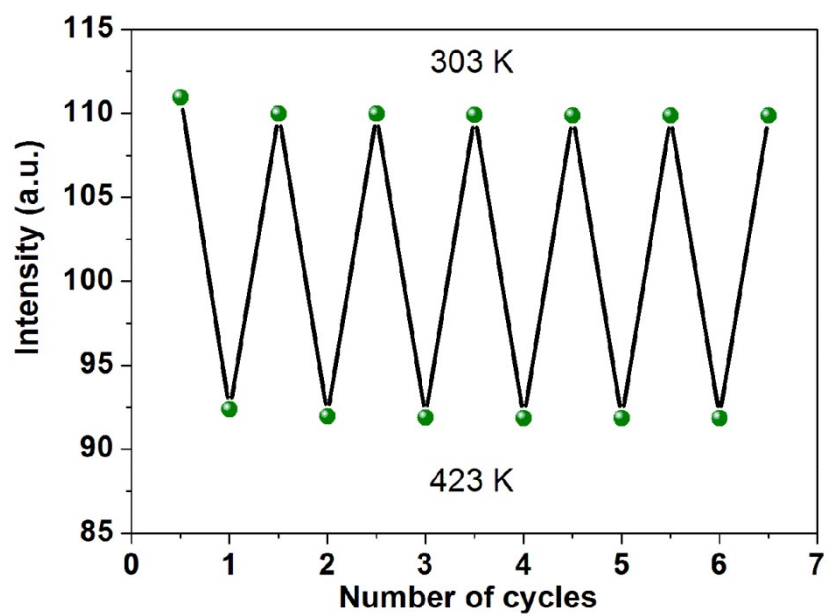

**Figure S13.** Reversible variation of the PL intensity of **1** between 303 and 423 K.

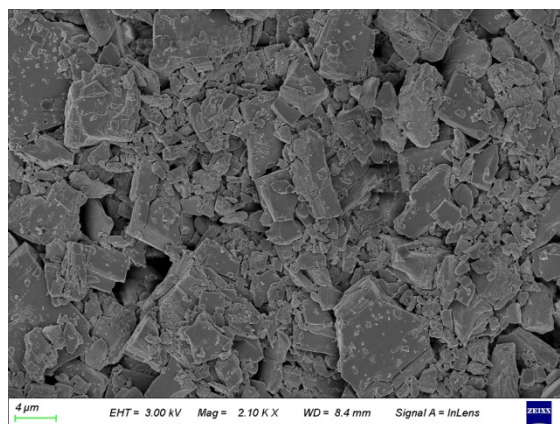

(a)

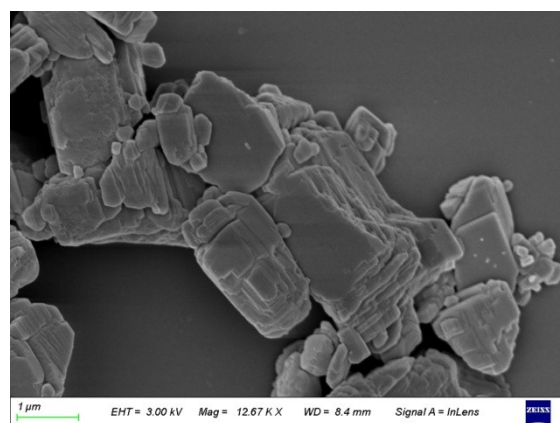

(b)

**Figure S14.** SEM images of **1** before (a) and after soaking in water for 60 days (b).

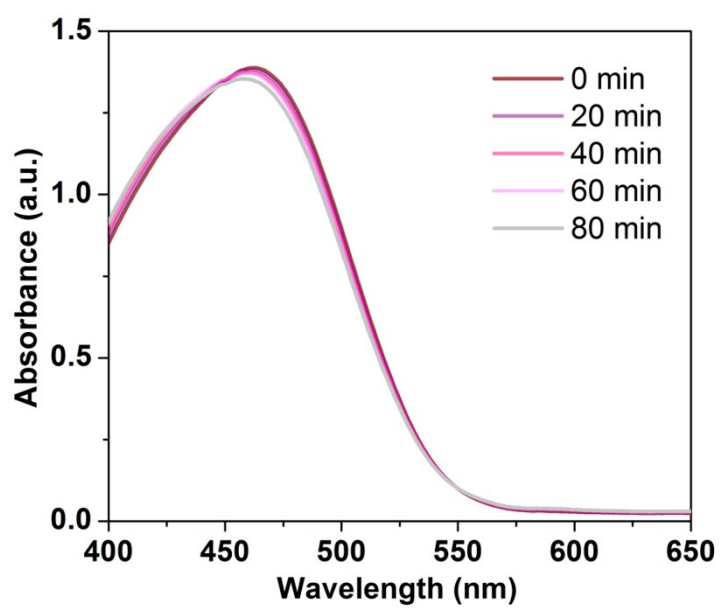

(a)

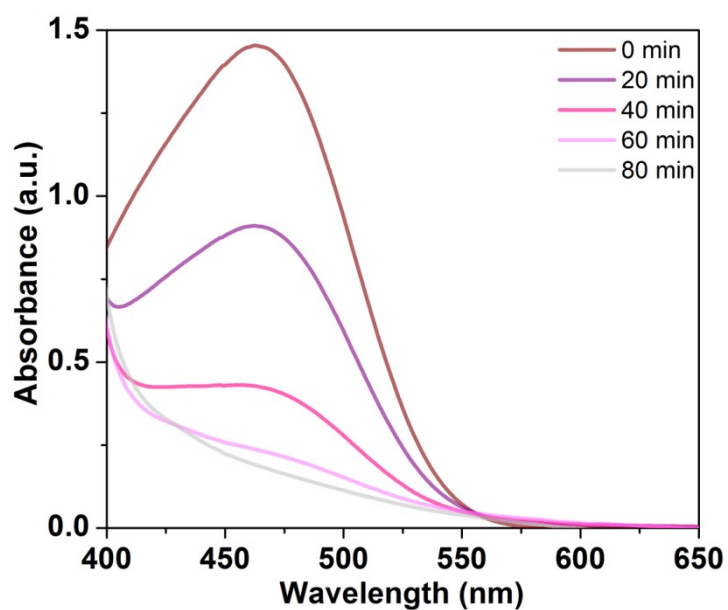

(b)

**Figure S15.** (a) Self-degradation of MO aqueous solution irradiated under light irradiation by detecting the maximum absorbance peak at 464 nm. (b) Degradation diagram of MO with presence of the powder of **1** (10 mg) under illumination.

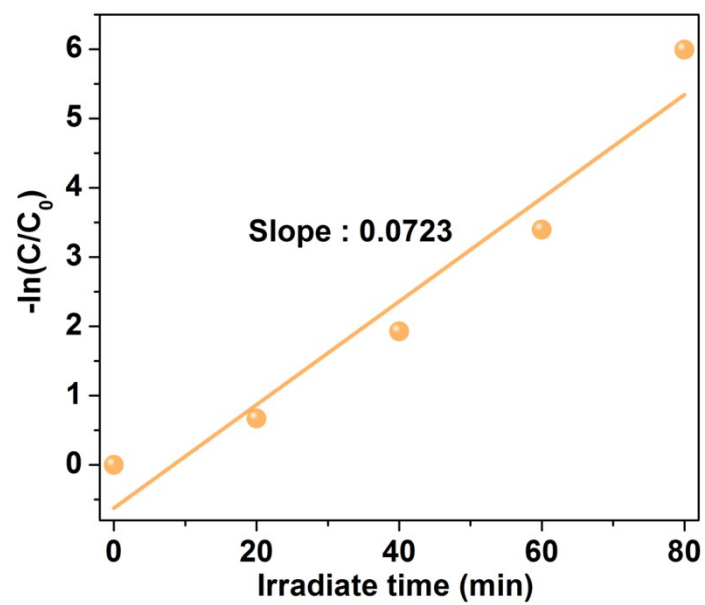

**Figure S16.** Rate constants of photocatalytic degradation for MO with presence of the powder of **1** (10 mg) under illumination.

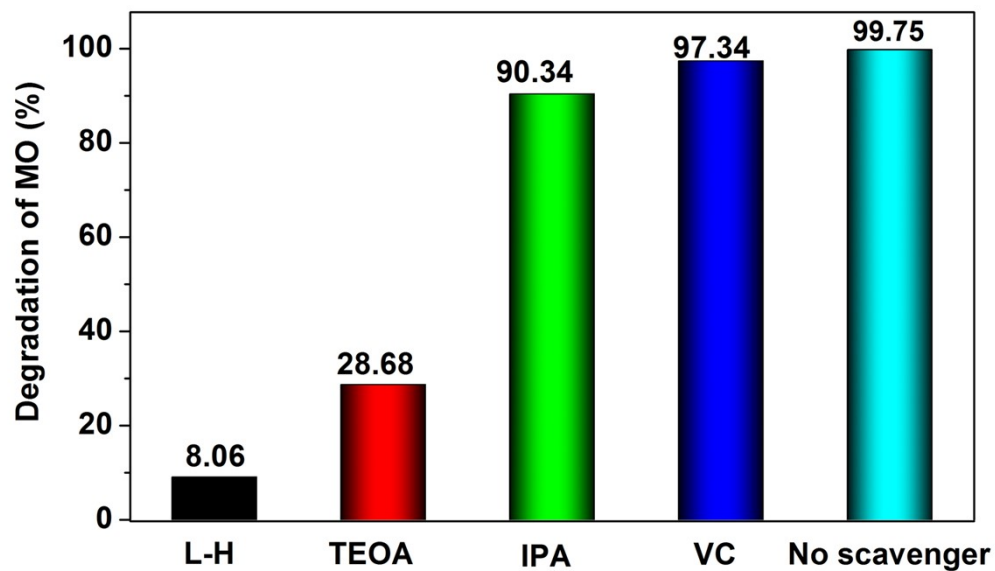

**Figure S17.** Bar chart of degradation rate for the detection of active species in the photocatalytic process of **1** by adding different scavengers. L-Histidine (L-H) for singlet oxygen ( $^1\text{O}_2$ ), Triethanolamine (TEOA) for hole ( $\text{h}^+$ ), propan-2-ol (IPA) for hydroxyl radicals ( $\cdot\text{OH}$ ), and Vitamin C (VC) for superoxide radicals ( $\cdot\text{O}_2^-$ ).

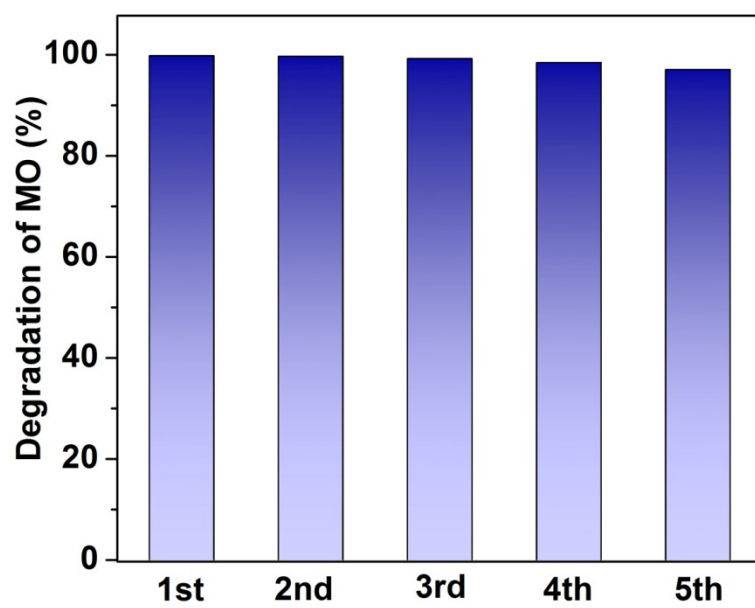

**Figure S18.** The reusability of **1** for the photocatalytic degradation of MO.

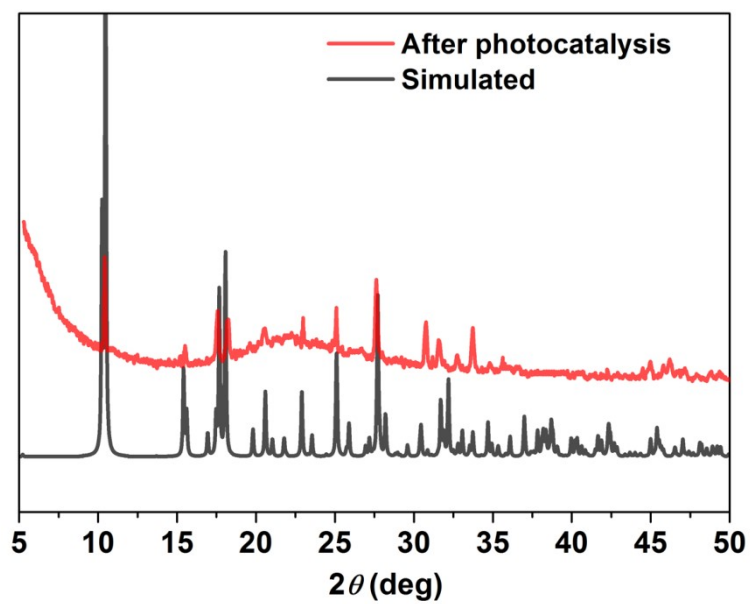

**Figure S19.** PXRD of 1 after photocatalytic degradation of MO.



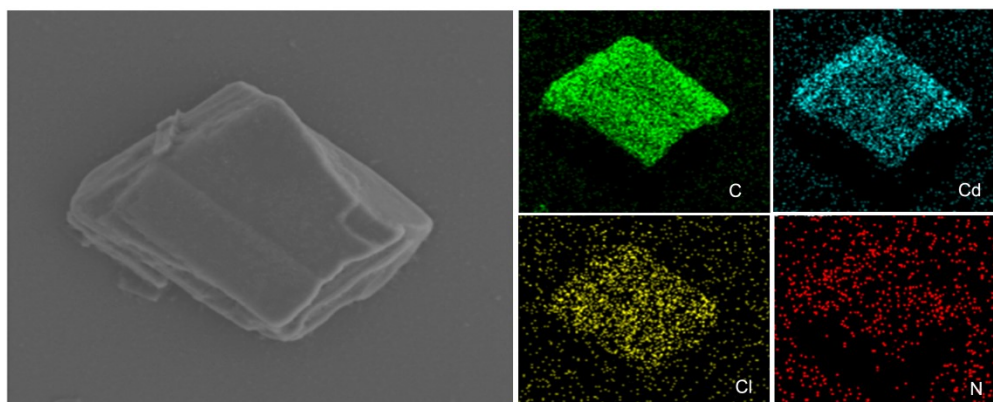

**Figure S20.** SEM image and elemental mapping images of **1** after photocatalytic degradation of MO.

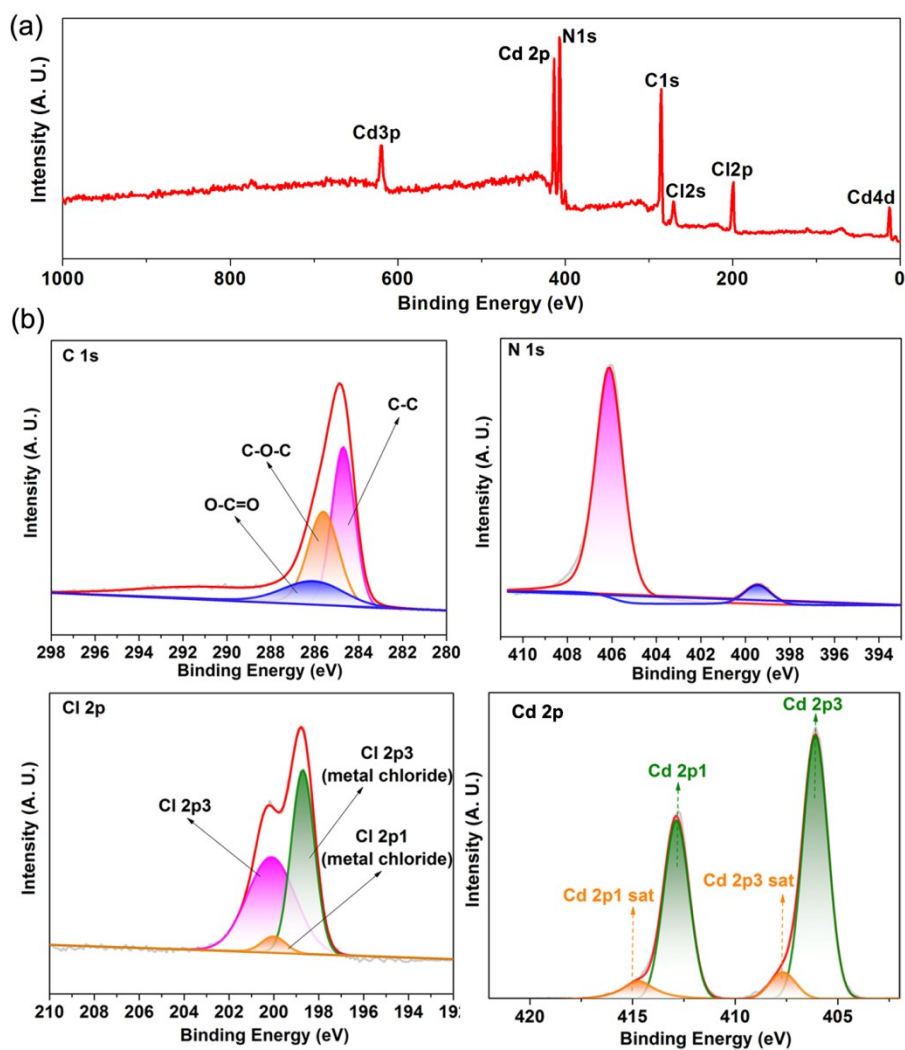

**Figure S21.** XPS spectrum (a), high-resolution XPS spectra of C 1s, N 1s, Cl 2p and Cd 2p (b) in **1** after photocatalytic degradation of MO.

### 3. Supporting Table

**Table S1.** Crystallographic data for **1**.

| <b>Complex</b>                                                                | <b>1</b>                                           |
|-------------------------------------------------------------------------------|----------------------------------------------------|
| Chemical formula                                                              | C <sub>13</sub> H <sub>9</sub> CdCl <sub>2</sub> N |
| Formula weight                                                                | 362.51                                             |
| Crystal system                                                                | Monoclinic                                         |
| Space group                                                                   | <i>P2<sub>1</sub>/c</i>                            |
| <i>a</i> (Å)                                                                  | 17.095(2)                                          |
| <i>b</i> (Å)                                                                  | 10.0218(10)                                        |
| <i>c</i> (Å)                                                                  | 7.0974(8)                                          |
| $\alpha$ (°)                                                                  | 90.00                                              |
| $\beta$ (°)                                                                   | 97.333(10)                                         |
| $\gamma$ (°)                                                                  | 90.00                                              |
| <i>V</i> (Å <sup>3</sup> )                                                    | 1199.8(2)                                          |
| <i>Z</i>                                                                      | 4                                                  |
| <i>D</i> (g cm <sup>-3</sup> )                                                | 2.007                                              |
| $\mu$ (mm <sup>-1</sup> )                                                     | 2.237                                              |
| <i>R</i> <sub>int</sub>                                                       | 0.0631                                             |
| Goof                                                                          | 1.391                                              |
| <i>R</i> <sub>1</sub> <sup>a</sup> ( <i>I</i> > 2σ( <i>I</i> )) <sup>b</sup>  | 0.0994                                             |
| <i>wR</i> <sub>2</sub> <sup>a</sup> ( <i>I</i> > 2σ( <i>I</i> )) <sup>b</sup> | 0.2296                                             |

<sup>a</sup>  $R_1 = \sum(|F_o| - |F_c|) / \sum|F_o|$ ; <sup>b</sup>  $wR_2 = [\sum w(|F_o|^2 - |F_c|^2) / \sum w(F_o^2)]^{1/2}$

**Table 2.** Selected bond lengths (Å) and angles (deg) for **1**<sup>a</sup>.

|                                        |            |                          |            |
|----------------------------------------|------------|--------------------------|------------|
| Cd1–Cl1                                | 2.496(3)   | Cd1–Cl1 <sup>A</sup>     | 2.700(3)   |
| Cd1–Cl2                                | 2.495(3)   | Cd1–Cl22                 | 2.705(3)   |
| Cl1–Cd1–Cl1 <sup>A</sup>               | 92.58(10)  | Cl1–Cd1–Cl2 <sup>B</sup> | 84.70(10)  |
| Cl1 <sup>A</sup> –Cd1–Cl2 <sup>B</sup> | 176.92(9)  | Cl2–Cd1–Cl               | 111.51(11) |
| Cl2–Cd1–Cl1 <sup>A</sup>               | 84.84(10)  | Cl2–Cd1–Cl2 <sup>B</sup> | 94.80(11)  |
| N1–Cd1–Cl1                             | 124.25(19) | N1–Cd1–Cl1 <sup>A</sup>  | 91.60(19)  |
| N1–Cd1–Cl2 <sup>B</sup>                | 91.13(18)  | N1–Cd1–Cl2               | 124.23(18) |

<sup>a</sup> Symmetry transformations used to generate equivalent atoms in **1**: A  $+x, 3/2-y, -1/2+z$ ; B  $+x, 3/2-y, 1/2+z$ .

**Table S3.** Comparison of photophysical properties of some developed phosphors.

| Phosphors                                                                           | Maintain emission intensity at 423 K | Synthesis conditions                | Emission peak (nm) | FWHM (nm) | PLQY (%) | Ref.      |
|-------------------------------------------------------------------------------------|--------------------------------------|-------------------------------------|--------------------|-----------|----------|-----------|
| [CdCl <sub>2</sub> (AD)]                                                            | 84%                                  | Solvothermal at 120°C for 3 h       | 504                | 100       | 65       | This work |
| LSN:Ce <sup>3+</sup>                                                                | 55%                                  | 20MPa<br>600 °C for 30 min          | 550                | –         | –        | 7         |
| SCASN:Eu <sup>2+</sup>                                                              | 59%                                  | Sintered at<br>1800 °C for 2 h      | 640                | –         | –        | 7         |
| (Lu <sub>0.9</sub> Ce <sub>0.1</sub> ) <sub>3</sub> Al <sub>5</sub> O <sub>13</sub> | 97%                                  | Sintered at<br>1700 °C for 10 h     | 530                | ~120      | –        | 7         |
| Na <sub>3</sub> Sc <sub>2</sub> (PO <sub>4</sub> ) <sub>3</sub> :Eu <sup>2+</sup>   | 100%                                 | Sintered at<br>1050 °C for 5 h      | 453                | 44        | –        | 8         |
| [(AD)Pb <sub>2</sub> Cl <sub>5</sub> ]                                              | 47%                                  | Hydrothermal<br>at 120°C for 12 h   | 533                | 86        | 7.45     | 9         |
| Tb-MOF                                                                              | 94.5%                                | Solvothermal<br>at 130°C for 7 days | 547                | –         | 53       | 10        |
| K <sub>3</sub> LuSi <sub>2</sub> O <sub>7</sub> :Eu <sup>2+</sup>                   | 59%                                  | Sintered at<br>1350 °C for 6 h      | 740                | 160       | 15       | 11        |
| ScBO <sub>3</sub> :Cr <sup>3+</sup>                                                 | 50%                                  | Sintered at<br>1000 °C for 10 h     | 800                | 120       | 73       | 12        |
| SrAl <sub>6</sub> Ga <sub>6</sub> O <sub>19</sub> :Cr <sup>3+</sup>                 | 100%                                 | Sintered at<br>1250 °C for 5 h      | ~770               | ~100      | 85       | 13        |
| YMAS:Cr <sup>3+</sup>                                                               | 94%                                  | Sintered at<br>1400 °C for 4 h      | 708                | 72        | 86       | 14        |
| CaMgSi <sub>2</sub> O <sub>6</sub> :Cr <sup>3+</sup>                                | 88%                                  | Sintered at<br>1250 °C for 4 h      | 780                | ~150      | –        | 15        |
| NaLaMgWO <sub>6</sub>                                                               | 72%                                  | Sintered at<br>1300 °C for 9 h      | 698                | ~60       | 64.8     | 16        |

## 4. Supporting References

- 1 CrysAlisPro, Rigaku Oxford Diffraction, Version 1.171.39.6a.
- 2 G. M. Sheldrick, *Acta Crystallogr. Sect. A*. 2008, **A64**, 112–122.
- 3 G. M. Sheldrick, *Acta Cryst.* 2015, **A71**, 3–8.
- 4 B. Delley, *J. Chem. Phys.*, 2000, **113**, 7756–7764.
- 5 S. J. Clark, M. D. Segall, C. J. Pickard, P. J. Hasnip, M. J. Probert, K. Refson, M. C. Payne, *Zeitschrift für Kristallographie*, 2005, **220**, 567–570.
- 6 B. Delley, *J. Chem. Phys.*, 1990, **92**, 508–517.
- 7 L. Chen, C.-C. Lin, C.-W. Yeh, R.-S. Liu, *Materials*, 2010, **3**, 2172–2195.
- 8 Y. H. Kim, P. Arunkumar, B. Y. Kim, S. Unithrattil, E. Kim, S.-H. Moon, J. Y. Hyun, K. H. Kim, D. Lee, J.-S. Lee, W. B. Im, *Nat. Mater.*, 2017, **16**, 543–550.
- 9 X. G. Yang, L. F. Ma, D. Yan, *Chem. Sci.*, 2019, **10**, 4567–4572.
- 10 Z. X. Lu, S. J. Wang, G.-L. Li, Z. Zhuo, H. M. Zhu, W. Wang, Y.-G. Huang, M. C. Hong, *ACS Appl. Mater. Interfaces*, 2022, **33**, 37894–37903.
- 11 J. W. Qiao, G. J. Zhou, Y. Y. Zhou, Q. Y. Zhang, Z. G. Xia, *Nat. Commun.*, 2019, **10**, 5267.
- 12 M.-H. Fang, P.-Y. Huang, Z. Bao, N. Majewska, T. Lesniewski, S. Mahlik, M. Grinberg, G. Leniec, S. M. Kaczmarek, C. W. Yang, K.-M. Lu, H.-S. Sheu, R.-S. Liu, *Chem. Mater.*, 2020, **32**, 2166–2171.
- 13 V. Rajendran, M.-H. Fang, W.-T. Huang, N. Majewska, T. Lesniewski, S. Mahlik, G. Leniec, S. M. Kaczmarek, W. K. Pang, V. K. Peterson, K. M. Lu, H. Chang, R. S. Liu, *J. Am. Chem. Soc.*, 2021, **143**, 19058–19066.
- 14 J. J. Feng, H. M. Liu, Z. Ma, J. H. Feng, L. F. Chen, J. H. Li, Q. G. Zeng, D. W. Wen, Y. Guo, *Chem. Eng. J.*, 2022, **449**, 137892.
- 15 D. W. Wen, H. M. Liu, Y. Guo, Q. G. Zeng, M. M. Wu, R. S. Liu, *Angew. Chem. Int. Ed.*, 2022, **61**, e202204411.
- 16 S. Wu, P. X. Xiong, Q. Liu, Y. Xiao, Y. S. Sun, E. H. Song, Y. Chen, *Adv. Optical Mater.*, 2022, **23**, 2201718.
